# Supplementary material
Source: publisher figshare collection journal article supplement (https://gsapubs.figshare.com/articles/dataset/_/24451876)
Supplement: Supplementary file 1 [file 1]

## Sheet: Sheet1
Table S4 δD composition of possible fluid reservoirs for comparation
References	Location	Rock type	Mineral type	Sample ID	δO(‰)	δD(‰)	Comment
Agrinier et al., 1988	Xigaze ophiolite rocks, South Tibet	Radiolarites	Whole rocks	X860	19.2	-70
Agrinier et al., 1988		Radiolarites	Whole rocks	X588	25.7	-69
Agrinier et al., 1988		pillow-lava	Whole rocks	D153	13	-81
Agrinier et al., 1988		pillow-lava	Whole rocks	D356	15	-88
Agrinier et al., 1988		pillow-lava	Whole rocks	X1	12.5	-97
Agrinier et al., 1988		pillow-lava	Whole rocks	X392	12.1	-89
Agrinier et al., 1988		pillow-lava	Whole rocks	X22	15.6	-87
Agrinier et al., 1988		pillow-lava	Whole rocks	X771	9.6	-96
Agrinier et al., 1988		trondjhemite	Whole rocks	D157e	11.5	-85
Agrinier et al., 1988		trondjhemite	Whole rocks	D390	9.7	-88
Agrinier et al., 1988		trondjhemite	Whole rocks	D475	13.4	-75
Agrinier et al., 1988		dolerite sill in trondjhemite	Whole rocks	D390a	9.5	-77
Agrinier et al., 1988		dolerite sill in trondjhemite	Whole rocks	D390c	7.8	-63
Agrinier et al., 1988		dolerite sill in trondjhemite	Whole rocks	X390b	9
Agrinier et al., 1988		dolerite	Whole rocks	D394b	7.2	-65
Agrinier et al., 1988		dolerite	Whole rocks	X25	8.9	-81
Agrinier et al., 1988		dolerite in isotropic gabbros	Whole rocks	D80	7.2	-70
Agrinier et al., 1988		dolerite in isotropic gabbros	Whole rocks	D78	7.2	-61
Agrinier et al., 1988		dolerite in isotropic gabbros	Whole rocks	X372	8	-50
Agrinier et al., 1988		dolerite in layered gabbros	Whole rocks	D392	8.3
Agrinier et al., 1988		dolerite in layered gabbros	Whole rocks	D397	7.3	-55
Agrinier et al., 1988		dolerite in serpentinized peridotites	Whole rocks	D49	9.4	-64
Agrinier et al., 1988		dolerite in serpentinized peridotites	Whole rocks	D431	7.2	-57
Agrinier et al., 1988		dolerite in serpentinized peridotites	Whole rocks	X360	6.8	-50
Agrinier et al., 1988		dolerite in fresh peridotites	Whole rocks	X500	7.3	-40
Agrinier et al., 1988		isotropic gabbro	Whole rocks	X575	8	-67
Agrinier et al., 1988		isotropic gabbro	Whole rocks	X572	9	-65
Agrinier et al., 1988		isotropic gabbro	Whole rocks	X480'	8	-73
Agrinier et al., 1988		layered gabbro	Whole rocks	D394	4.8	-50
Agrinier et al., 1988		layered gabbro	Whole rocks	X8	8	-53
Agrinier et al., 1988		isotropic gabbros in serpentinized peridotite	Whole rocks	X361	9.4	-53
Agrinier et al., 1988		isotropic gabbros in serpentinized peridotite	Whole rocks	X593	6.6	-57
Agrinier et al., 1988		isotropic gabbro	Whole rocks	X27	11.5	-50
Agrinier et al., 1988		isotropic gabbro	Whole rocks	X643	6.9	-61
Agrinier et al., 1988		dunite	Whole rocks	D72	4.4	-114
Agrinier et al., 1988		wehrlite	Whole rocks	D274	5.7	-104
Agrinier et al., 1988		serpentinized harzburgite	Whole rocks	X735	4.7	-190
Agrinier et al., 1988		serpentinized harzburgite	Whole rocks	X571	4.3
Agrinier et al., 1988		serpentinized harzburgite	Whole rocks	X487	5.9	-159
Agrinier et al., 1988		serpentinized harzburgite	Whole rocks	X492	4.5	-207
Agrinier et al., 1988		harzburgite	Whole rocks	X32	5.2	-160
Agrinier et al., 1988		harzburgite	Whole rocks	X4	5.4	-134
Agrinier et al., 1988		harzburgite	Whole rocks	X98	5.2	-120
Agrinier et al., 1988		harzburgite	Whole rocks	X515	5.7	-171
Agrinier et al., 1988		harzburgite	Whole rocks	X513	5	-173
Agrinier et al., 1988		diopside-bearing harzburgite	Whole rocks	X627	6.1	-177
Agrinier et al., 1988		serpentinized diopside-bearing harzburgite	Whole rocks	X640	2.8	-255
Agrinier et al., 1988		diopside-bearing harzburgite	Whole rocks	X548	5	-120
Agrinier et al., 1988		diopside-bearing harzburgite	Whole rocks	X546	5.3	-101
Agrinier et al., 1988		diopside-bearing harzburgite	Whole rocks	X545	6	-164
Agrinier et al., 1988		serpentinized diopside-bearing harzburgite	Whole rocks	X685	6.4	-171
Agrinier et al., 1988		serpentinized lherzolite	Whole rocks	X636	7.8	-180
Agrinier et al., 1988		serpentinized lherzolite	Whole rocks	X678	6.2	-236
Agrinier et al., 1988		serpentinized lherzolite	Whole rocks	X766	4.6	-166
Alt and Bach,2006	Southwest Indian Ridge	ODP Hole735B Gabbro	Hornblendes	2R3	4.4	-58	vein
Alt and Bach,2006			Hornblendes	22R3	3.7	-48.4	vein
Alt and Bach,2006			Hornblendes	26R1	3.6	-51.5	vein
Alt and Bach,2006			Hornblendes	33R2	1.4	-48	vein
Alt and Bach,2006			Hornblendes	133R3	5.1	-40.5	vein
Liu et al., 2021	Jiding diabese, South Tibet	Diabase	Amphibole	18JD135	4.03119	-54.9466
Liu et al., 2021		Diabase	Amphibole	18JD136	4.11916	-66.6559
Liu et al., 2021		Diabase	Amphibole	18JD137	3.16246	-68.3692
Liu et al., 2021		Diabase	Amphibole	18JD140	5.72765	-67.4009
Liu et al., 2021		Diabase	Amphibole	18JD142	5.6753	-76.5924
Liu et al., 2021		Diabase	Amphibole	18JD143	5.59533	-66.247
Liu et al., 2021		Diabase	Amphibole	18JD145	3.93384	-72.3989
Liu et al., 2021		Diabase	Amphibole	18JD146	5.46937	-70.0328
Liu et al., 2021		Diabase	Amphibole	18JD147	5.8747	-73.8707
Liu et al., 2021		Diabase	Amphibole	18JD148	5.34498	-68.0306
Liu et al., 2021		Diabase	Amphibole	18JD149	4.71132	-69.4455
Liu et al., 2021		Diabase	Amphibole	18JD150	5.57386	-77.8191
Liu et al., 2021		Diabase	Amphibole	18JD151	5.78675	-66.2761
Zheng et al., 1982	Tibet, present-day geothemal water
Zheng et al., 1982			geothemal water in Tibet	5	-12.72	-80.3
Zheng et al., 1982			geothemal water in Tibet	11	-16.24	-128.3
Zheng et al., 1982			geothemal water in Tibet	15	-12.18	-117.5
Zheng et al., 1982			geothemal water in Tibet	24	-14.34	-120
Zheng et al., 1982			geothemal water in Tibet	28	-16.96	-131.1
Zheng et al., 1982			geothemal water in Tibet	29	-15.93	-130.8
Zheng et al., 1982			geothemal water in Tibet	30	-16.13	-128.8
Zheng et al., 1982			geothemal water in Tibet	37	-16.14	-140.3
Zheng et al., 1982			geothemal water in Tibet	38	-17.85	-133.5
Zheng et al., 1982			geothemal water in Tibet	43	-16.86	-127.9
Zheng et al., 1982			geothemal water in Tibet	44	-18.58	-149.1
Zheng et al., 1982			geothemal water in Tibet	46	-14.89	-114
Zheng et al., 1982			geothemal water in Tibet	50	-15.75	-148
Zheng et al., 1982			geothemal water in Tibet	52	-15.02	-145.4
Zheng et al., 1982			geothemal water in Tibet	62	-13.25	-95.9
Zheng et al., 1982			geothemal water in Tibet	83	-21.63	-164.5
Zheng et al., 1982			geothemal water in Tibet	89	-15.09	-100.5
Zheng et al., 1982			geothemal water in Tibet	102		-162.3
Zheng et al., 1982			geothemal water in Tibet	124	-20.54	-153
Zheng et al., 1982			geothemal water in Tibet	135	-19.42	-144.5
Zheng et al., 1982			geothemal water in Tibet	145	-14.78	-141.3
Zheng et al., 1982			geothemal water in Tibet	147	-18.2	-146.4
Zheng et al., 1982			geothemal water in Tibet	151	-18.98	-159
Zheng et al., 1982			geothemal water in Tibet	160	-17.02	-116.7
Zheng et al., 1982			geothemal water in Tibet	175	-15.73	-133.4
Zheng et al., 1982			geothemal water in Tibet	184	-15.18	-133.1
Zheng et al., 1982			geothemal water in Tibet	207	-15.6	-135.4
Zheng et al., 1982			geothemal water in Tibet	222	-18.78	-147
Zheng et al., 1982			geothemal water in Tibet	237	-16.63	-122.4
Zheng et al., 1982			geothemal water in Tibet	255	-16.32	-128
Zheng et al., 1982			geothemal water in Tibet	256	-14.43	-95.9
Zheng et al., 1982			geothemal water in Tibet	303		-136.7
Zheng et al., 1982			geothemal water in Tibet	309	-13.78	-98.2
Zheng et al., 1982			geothemal water in Tibet	319	-13.25	-132.6
Gébelin et al., 2017	STD. South Tibet, possible meteoric water
Gébelin et al., 2017		leucogranite	water from Ms	R-05-03		-78
Gébelin et al., 2017		leucogranite	water from Ms	R-05-03		-69
Gébelin et al., 2017		leucogranite	water from Ms	R-05-04		-89
Gébelin et al., 2017		leucogranite	water from Ms	R-05-04		-75
Gébelin et al., 2017		leucogranite	water from Ms	M2		-89
Gébelin et al., 2017		leucogranite	water from Ms	R-03-24		-118
Gébelin et al., 2017		leucogranite	water from Ms	R-03-24		-98
Gébelin et al., 2017		leucogranite	water from Ms	R-05-08		-103
Gébelin et al., 2017		leucogranite	water from Ms	R-05-08		-100
Gébelin et al., 2017		leucogranite	water from Ms	R-03-25		-69
Gébelin et al., 2017		leucogranite	water from Ms	R-03-25		-65
Gébelin et al., 2017		leucogranite	water from Ms	R-03-26		-88
