# Supplementary material
Source: publisher figshare collection journal article supplement (https://gsapubs.figshare.com/articles/dataset/_/24451876)
Supplement: Supplementary file 1 [file 1]

Zhao, Q., et al., 2023, Timing of India-Asia collision and significant coupling between them around 51 Ma: Insights from the activation history of the Zhongba-Gyangze thrust in southern Tibet: Geology, <https://doi.org/10.1130/G51615.1>

## Supplemental Material

### **Analytical Methods and Supporting Data**

**Tables S1–S4.**

## **SUPPLEMENTAL MATERIAL**

### **Timing of India–Asia collision and significant coupling between them around 51 Ma: Insights from the activation history of the Zhongba-Gyangze Thrust in Southern Tibet**

**Qi Zhao<sup>1,2</sup>, Yi Yan <sup>1,2 \*</sup>, Satoshi Tonai<sup>3</sup>, Yildirim Dilek <sup>4</sup>, Zuofei Zhu<sup>5</sup>**

<sup>1</sup>*State Key Laboratory of Isotope Geochemistry, Guangzhou Institute of Geochemistry, Chinese Academy of Sciences (CAS), Guangzhou, 510640, China*

<sup>2</sup>*CAS Center for Excellence in Deep Earth Science, Guangzhou, 510640, China*

<sup>3</sup>*Faculty of Science & Technology, Kochi University, Kochi 780-8520, Japan*

<sup>4</sup>*Department of Geology & Environmental Earth Science, Miami University, Oxford, Ohio, 45056, USA*

<sup>5</sup>*Sanya Inst. of South China Sea Geology, Guangzhou Marine Geol. Survey, Sanya, 572025, China*

**\*Corresponding author:** (Yan Yi) [yanyi@gig.ac.cn](mailto:yanyi@gig.ac.cn)

## **Analytical Methods:**

### ***1. Mineralogical Observation***

Scanning electron microscopy (SEM) images were performed using a TESCAN MIRA3 field-emission scanning electron microprobe integrated with energy dispersive X-ray analyser at the Testing Center, Tuoyan Analytical Technology Co. Ltd. (Guangzhou, China). X-ray diffraction (XRD) patterns of random powder samples were used for mineral quantification. Random powder samples side-loaded into an Al sample holder were scanned over angles of  $2\theta = 3\text{--}75^\circ$  by the X'Pert Pro multi-purpose diffractometer with  $\text{CuK}\alpha$  radiation (45 kV, 40 mA) at the Marine Core Research Institute, Kochi University, Japan. BGMN® and Profex 5.1 are used for polytype quantification through Rietveld Refinement of the powder X-ray diffraction data (Doebelin and Kleeberg, 2015; Boles et al., 2018).

## 2. *K-Ar dating*

Isotopic dating analyses for selected fractions were undertaken in Hiruzen Institute for Geology and Chronology Co., Ltd., Japan. We used Teflon beakers containing a mixture of nitric acid and hydrofluoric acid to dissolve each fraction (~50 mg) for 12 h. The samples were then dried on a hot plate before being re-decomposed in HCl. The resulting solution was then used for potassium qualitative analysis by flame photometry. We ran each analysis twice, thus the reproducibility of our sample was confirmed. An average value was obtained for calculating the K-Ar age. Based on the multiple runs of two standards (JB-1 basalt and JG-1 granodiorite; [Imai et al., 1995](#)), the analytical error is within 2%. The analytical procedures are described in detail in [Nagao et al. \(1984\)](#).

For argon isotopic analysis, we first wrapped each fraction (~70–75 mg) in a thin aluminum foil and placed it in a sample holder and then used the ribbon and mantle heater to heat the sample for three days at 180–200 °C, thus the adsorption gas would release in a vacuum. Then we dropped the remaining sample into a molybdenum crucible and heated it to 1500 °C for half an hour, thus the activated gases (carbon, hydrogen, oxygen, and sulfur) were removed. Finally, we analyzed purified argon gas by using the mass spectrometer after the isotopic dilution method of [Itaya et al. \(1991\)](#). Multiple analyses of JG-1 biotite (ca. 91 Ma) were used as the standard ([Itaya et al., 1991](#); [Yagi et al., 2015](#)), the standard deviation of the  $^{38}\text{Ar}$  spike calibrations was determined to be within 1%. The analytical methods for calculating the age are described in detail in [Nagao et al. \(1984\)](#) and [Nagao and Itaya \(1988\)](#). The decay constants for  $^{40}\text{K}$  to  $^{40}\text{Ar}$  ( $0.581 \times 10^{-10}/\text{year}$ ),  $^{40}\text{Ca}$  ( $4.962 \times 10^{-10}/\text{year}$ ), and  $^{40}\text{K}$  content ( $1.167 \times 10^{-4}$ ) were used for the age calculation in potassium ([Steiger and Jäger](#)

1977). Ages with the  $2\sigma$  confidence level were obtained.

The York-type weighted linear regression was used for extrapolating the ages of 0% and 100%  $2M_1$  illite (Thirumalai et al., 2011; Bailey et al., 2021). Errors on the ages include uncertainties from Ar measurements, K measurements, and XRD illite polytype determinations. The uncertainties on illite polytypes were calculated from the estimated standard deviations of each Rietveld refinement analysis (e.g., Bailey et al., 2021).

### ***3. $\delta D$ measurement***

Samples (0.2-0.5mg) were dried in a constant-temperature oven at 105°C for at least 4 hours. Wrap the samples in clean, dry silver cups for later use. Begin by flushing the air inside the Flash EA elemental analyzer with high-purity helium gas to reduce the  $H_2$  background. Once the temperature reaches 1400°C and the  $H_2$  background drops below 100mV, the sample testing can be performed. Using the AS200 autosampler, the silver cup containing the mineral sample is placed into a ceramic tube with glassy carbon for high-temperature pyrolysis, releasing  $H_2O$ . The  $H_2O$  undergoes a reduction reaction with carbon at high temperatures, generating  $H_2$ , which is carried into the MAT253 mass spectrometer by a high-purity helium gas stream for continuous flow analysis. The measurement results are reported as  $\delta D_{VSMOW}$  (relative to the IAEA-VSMOW standard with  $\delta D_{VSMOW} = 0.0$ ), with an analytical precision better than  $\pm 2.0\text{‰}$ .

### **References:**

- Bailey, L.R., Kirk, J., Hemming, S.R., Krantz, R.W., and Reiners, P.W., 2021, Eocene fault-controlled fluid flow and mineralization in the Paradox Basin, United States: *Geology*, v. 50, p. 326–330, doi: 10.1130/G49466.1.
- Boles, A., Schleicher, A.M., Solum, J., and van der Pluijm, B., 2018, Quantitative X-Ray Powder Diffraction and the Illite Polytype Analysis Method for Direct Fault Rock

Dating: A Comparison of Analytical Techniques: *Clays and Clay Minerals*, v. 66, p. 220–232, doi:10.1346/CCMN.2018.064093.

Doebelin, N., and Kleeberg, R., 2015, Profex: a graphical user interface for the Rietveld refinement program BGMN: *Journal of Applied Crystallography*, v. 48, p. 1573–1580, doi:10.1107/S1600576715014685.

Itaya, T., Nagao, K., Inoue, K., Honjou, Y., Okada, T., and Ogata, A., 1991, Argon isotope analysis by a newly developed mass spectrometric system for K-Ar dating: *Mineralogical Journal*, v. 15, p. 203–221, doi: 10.2465/minerj.15.203.

Nagao, K., Nishido, H., Itaya, T., and Ogata, K., 1984, An age determination by K-Ar method: *Bulletin of the Hiruzen Research Institute, Okayama* [in Japanese with English abstract]: *Universitas Scientiarum*, v. 9, p. 19–38.

Nagao, K., and Itaya, T., 1988, K-Ar age determination [in Japanese with English abstract]: *Memoir of Geological Society of Japan*, v. 29, p. 5–21.

Steiger, R., and Jäger, E., 1977, Subcommittee on geochronology: convention on the use of decay constants in geo- and cosmochemistry: *Earth and Planetary Science Letters*, v. 36, p. 359–362, doi: 10.1016/0012-821X(77)90060-7.

Thirumalai, K., Singh, A., and Ramesh, R., 2011, A MATLAB Code to Perform Weighted Linear Regression with (correlated or uncorrelated) Errors in Bivariate Data: *Journal of the Geological Society of India*, v. 77, p. 377–380.

Yagi, K., Okada, T., Honjou, Y., and Itaya, T., 2015, Argon analyses by isotopic dilution method using argon 38 spike with HIRU: Reproducibility and reliability in 25 years K-Ar dating: *Bulletin of the Research Institute of Technology, Okayama: Universitas Scientiarum*, v. 33, p. 42–52.
